# Supplementary material for: Design, synthesis, anticonvulsant and analgesic studies of new pyrazole analogues: a Knoevenagel reaction approach
Source: Royal Society of Chemistry journal article supplement (doi:10.1039/c5ra17391d), 2015-01-01
Supplement: c5ra17391d1.pdf [file c5ra17391d1.pdf]

## Supplementary Material

### Design, synthesis, anticonvulsant and analgesic studies of new pyrazole analogues: A Knoevenagel reaction approach

Shivapura Viveka<sup>a</sup>, Dinesha<sup>a</sup>, Prasanna Shama<sup>b</sup>, Shivalingegowda Naveen<sup>c</sup>, Neratur Krishnappagowda Lokanath<sup>d</sup>, Gundibasappa Karikannar Nagaraja<sup>a\*</sup>

<sup>a</sup>*Department of Studies in Chemistry, Mangalore University, Mangalagangothri 574199, Karnataka, India*

<sup>b</sup>*Department of Pharmacology, N.G.S.M. Institute of Pharmaceutical Sciences, Paneer Deralakatte, Mangalore-574160, Karnataka, India*

<sup>c</sup>*Institution of Excellence, Vijnana Bhavana, Manasagangotri, University of Mysore, Mysore 570 006, India.*

<sup>d</sup>*Department of Studies in Physics, Manasagangotri, University of Mysore, Mysore 570 006, India.*

### Experimental

#### Methods and materials

All the reagents were purchased from commercial suppliers Sigma-Aldrich, Spectrochem India and used without further purification. Melting points were determined in an open capillary tube and were uncorrected. The progress of each reaction was monitored by ascending thin layer chromatography (TLC) on silica gel G (Merck 1.05570.0001), visualized by UV light. The IR spectra (in KBr pellets) were recorded on a Shimadzu-FTIR spectrometer and the wave numbers were given in  $\text{cm}^{-1}$ . The  $^1\text{H}$  NMR and  $^{13}\text{C}$  NMR spectra were recorded ( $\text{CDCl}_3/\text{DMSO}-d_6$  mixture) on a Bruker AMX-400 NMR spectrometer with 5mm PABBO BB-1H TUBES with TMS as internal standard. The X-ray intensity data were collected at a temperature of 296 K on a Bruker Proteum2 CCD diffractometer equipped with an X-ray generator operating at 45 kV and 10 mA, using  $\text{CuK}_\alpha$  radiation. Mass spectra were recorded in Agilent Technology LC-mass spectrometer. Elemental analyses were carried out using VARIO EL-III (Elementar Analysensysteme GmbH).

<sup>1</sup>H NMR of compound of **1a**

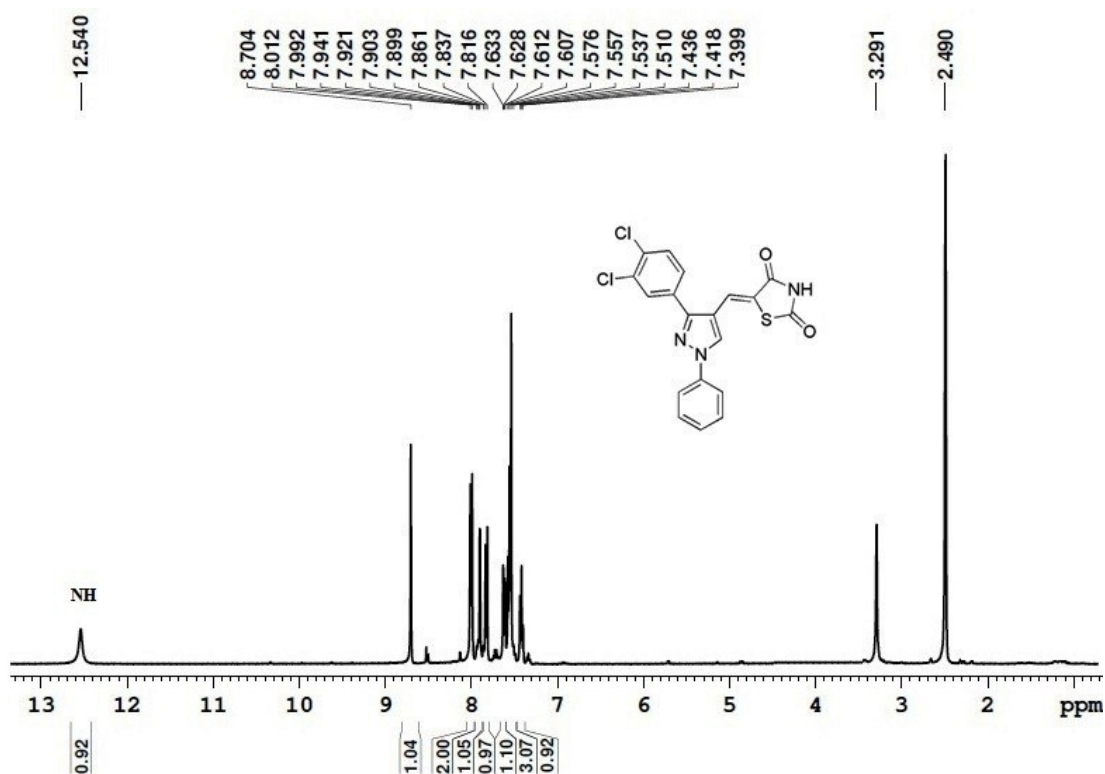

<sup>1</sup>H NMR of compound of **2b**

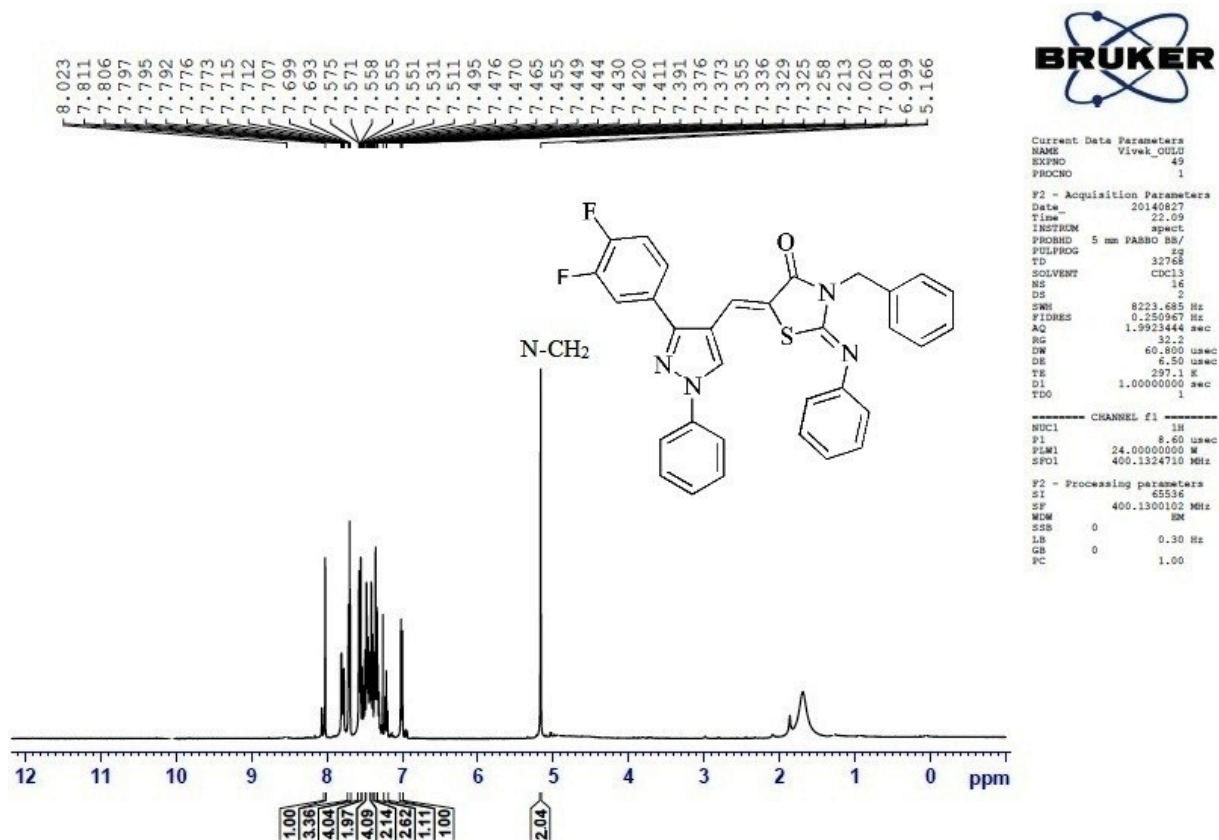

# <sup>1</sup>H NMR of compound of 3a

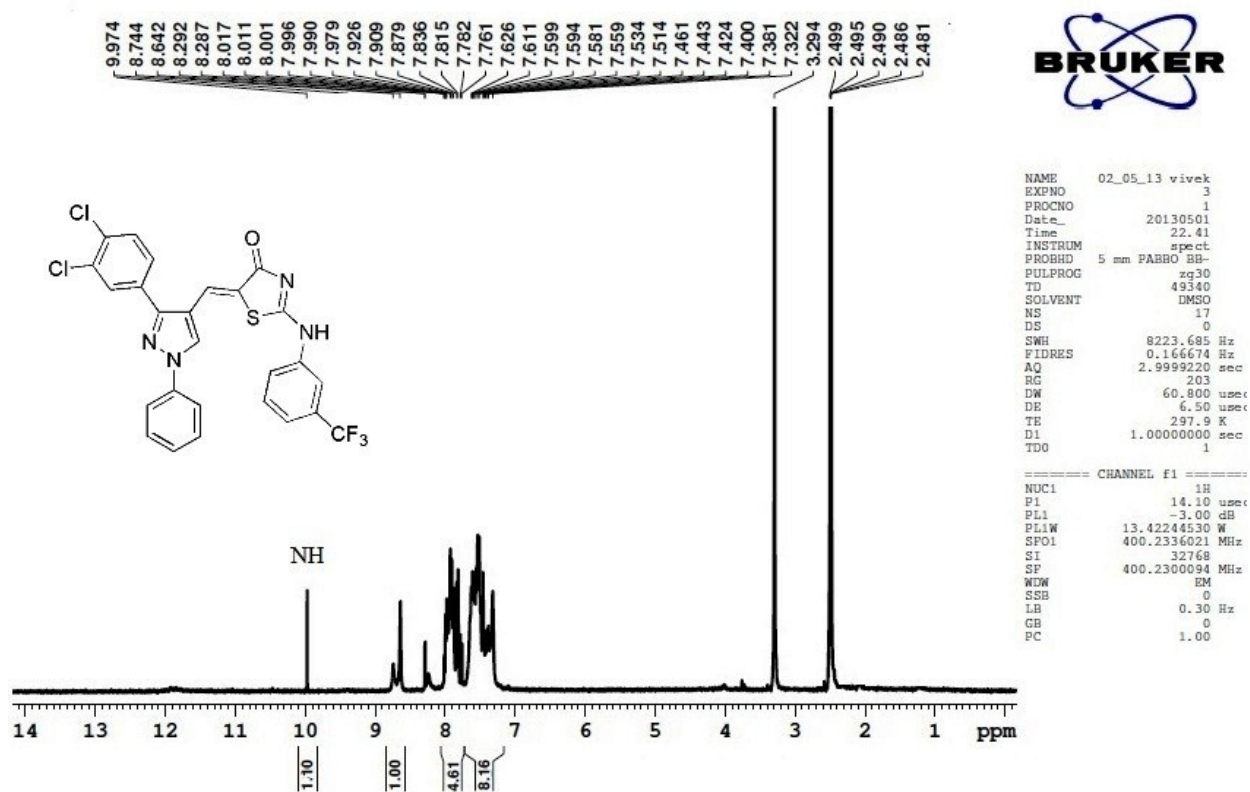

# <sup>1</sup>H NMR of compound of 4a

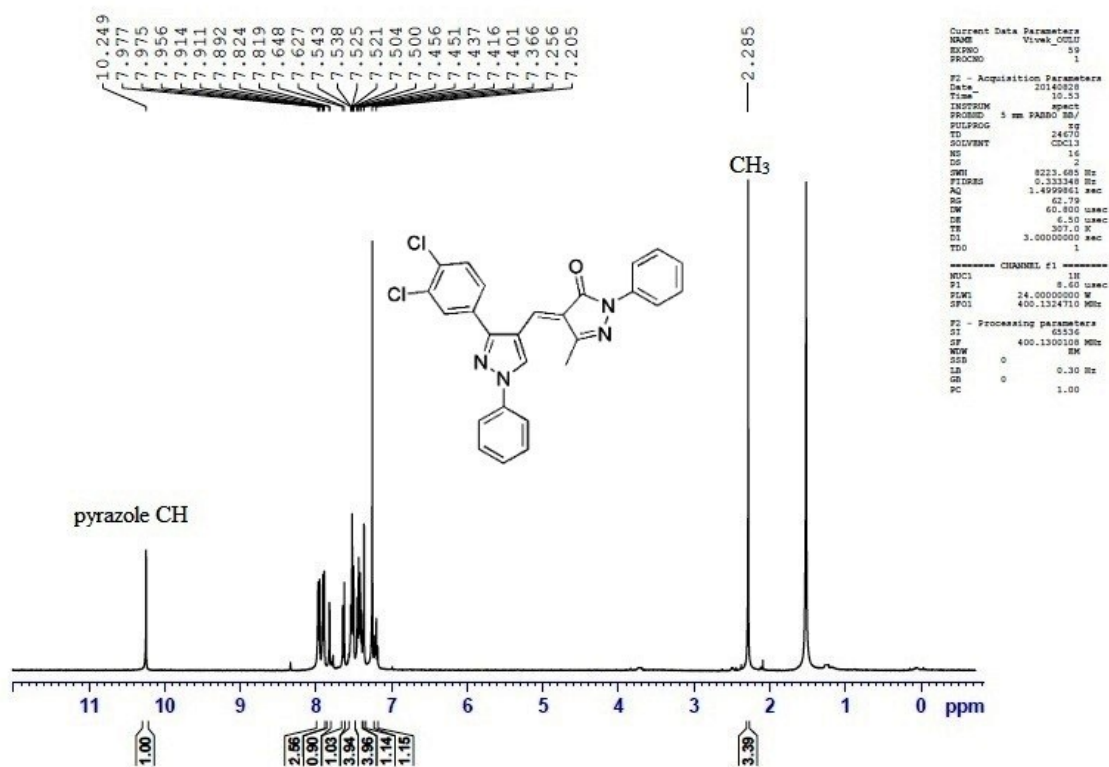

# <sup>1</sup>H NMR of compound of 5a

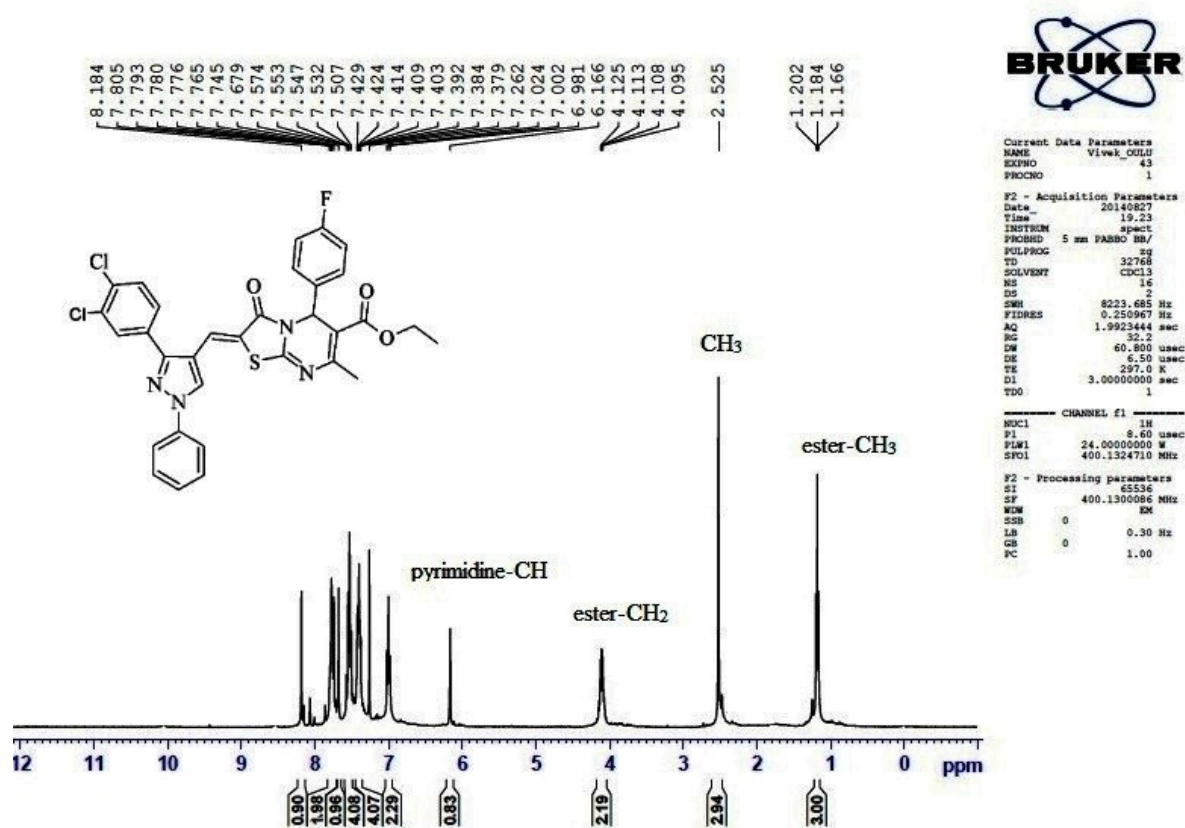

# <sup>1</sup>H NMR of compound of 6a

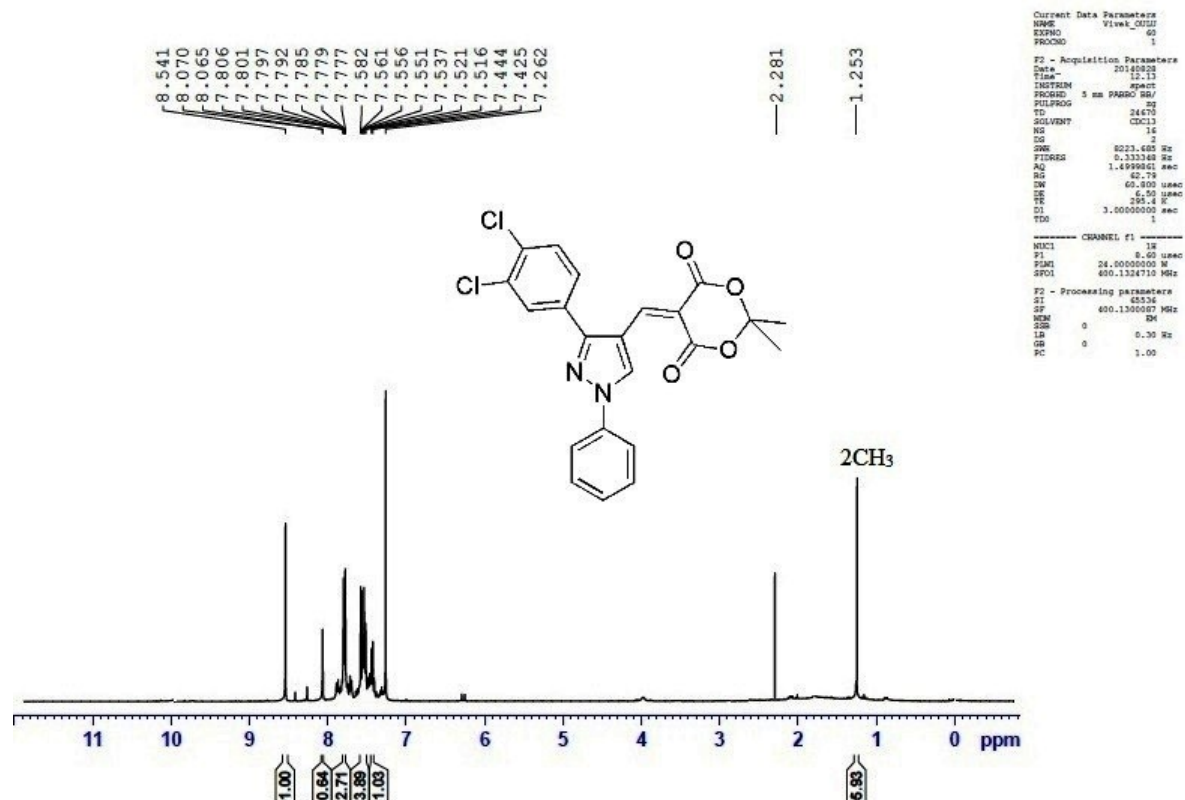

<sup>1</sup>H NMR of compound of 7a

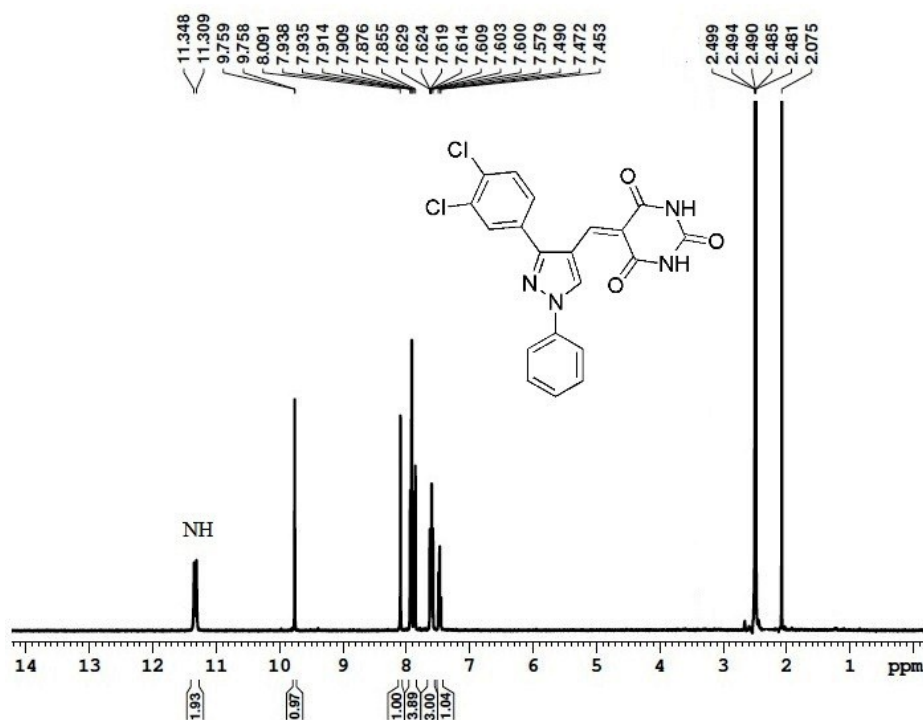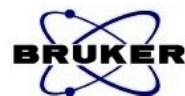

NAME 02\_05\_13 vivek  
EXPNO 5  
PROCNO 1  
Date 20130501  
Time 22.55  
INSTRUM spect  
PROBHD 5 mm PABBO BB-  
PULPROG zg30  
TD 49340  
SOLVENT DMSO  
NS 9  
DS 0  
SWH 8223.685 Hz  
FIDRES 0.166674 Hz  
AQ 2.9999220 sec  
RG 203  
DW 60.800 usec  
DE 6.50 usec  
TE 298.0 K  
D1 1.0000000 sec  
TD0 1

===== CHANNEL f1 =====  
NUC1 1H  
P1 14.10 usec  
PL1 -3.00 dB  
PL1W 13.42244530 W  
SFO1 400.2336021 MHz  
SI 32768  
SF 400.2300095 MHz  
WDW EM  
SSB 0  
LB 0.30 Hz  
GB 0  
PC 1.00

<sup>13</sup>C NMR of compound of 1a

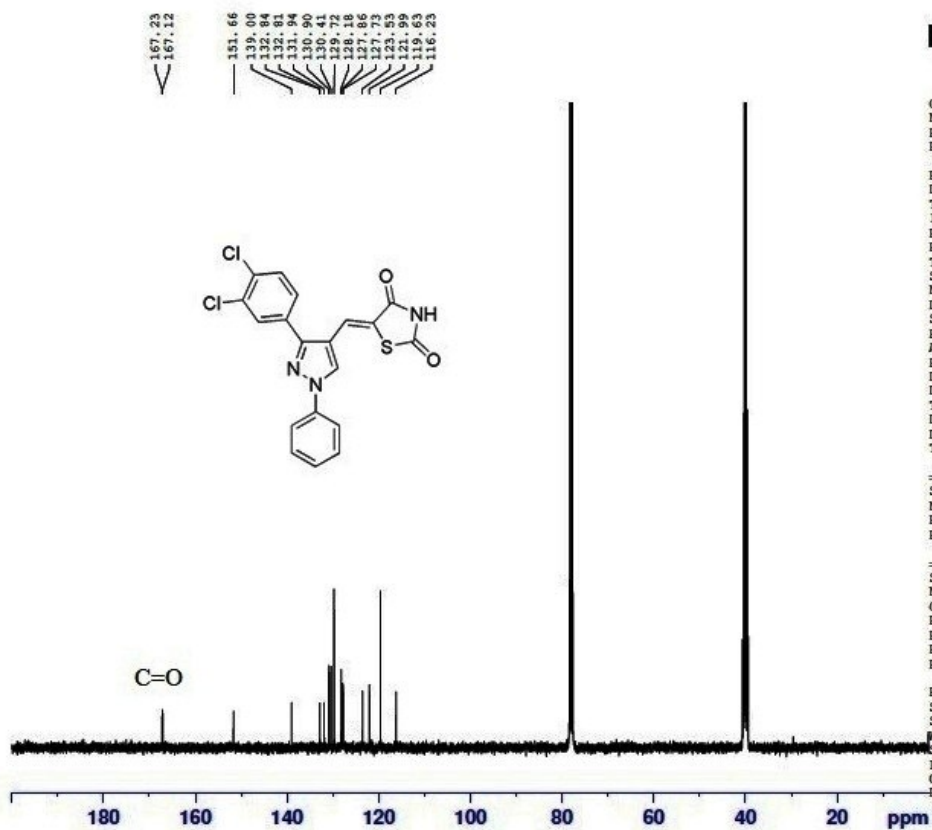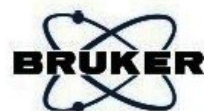

Current Data Parameters  
NAME C6  
EXPNO 2  
PROCNO 1

F2 - Acquisition Parameters  
Date\_ 20150131  
Time 12.28  
INSTRUM spect  
PROBHD 5 mm PABBO BB/  
PULPROG zgpg30  
TD 65536  
SOLVENT DMSO  
NS 2048  
DS 4  
SWH 24038.461 Hz  
FIDRES 0.366798 Hz  
AQ 1.3631488 sec  
RG 202.26  
DW 20.800 usec  
DE 6.50 usec  
TE 296.1 K  
D1 2.00000000 sec  
D11 0.03000000 sec  
TD0 1

===== CHANNEL f1 =====  
SFO1 100.6479769 MHz  
NUC1 13C  
P1 9.40 usec  
PL1 57.00000000 W

===== CHANNEL f2 =====  
SFO2 400.2316009 MHz  
NUC2 1H  
CPDPRG2 waltz16  
PCPD2 90.00 usec  
PL12 11.00000000 W  
PL13 0.28749999 W  
PL13 0.23287000 W

F2 - Processing parameters  
SI 32768  
SF 100.6379140 MHz  
WDW EM  
SSB 0  
LB 1.00 Hz  
GB 0  
PC 1.40



# <sup>13</sup>C NMR of compound of 2a

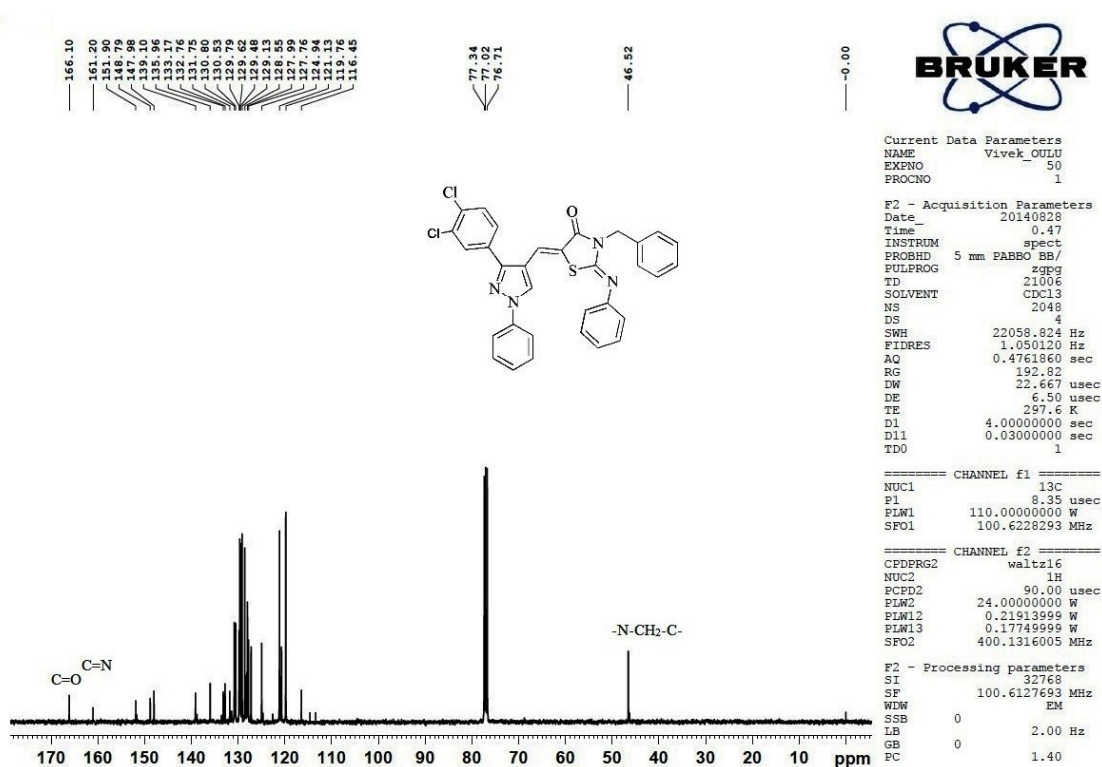

# <sup>13</sup>C NMR of compound of 3a

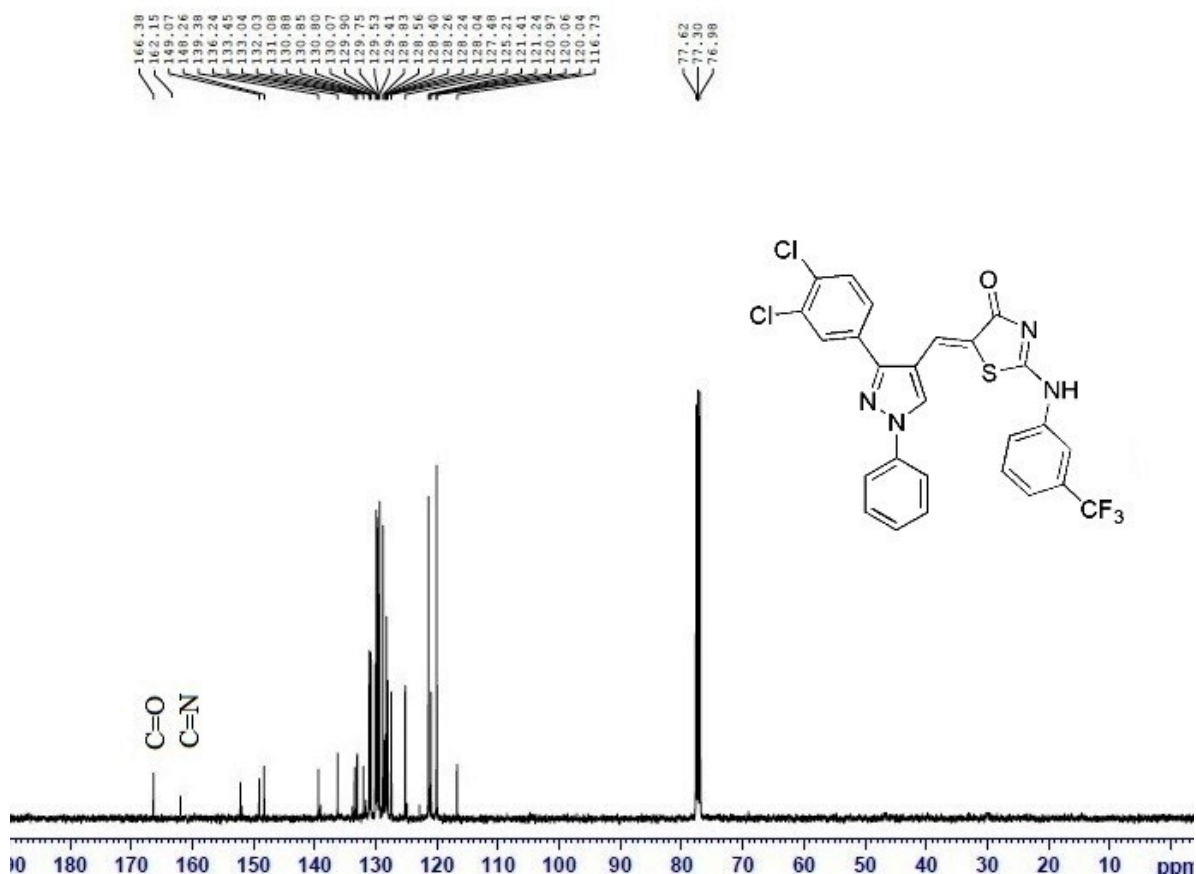

Chemical structure of compound 10: CC1=CN(C1C2=CC=CC=C2)C=C3C(=O)N(C3)C4=CC=CC=C4

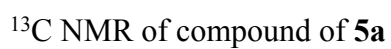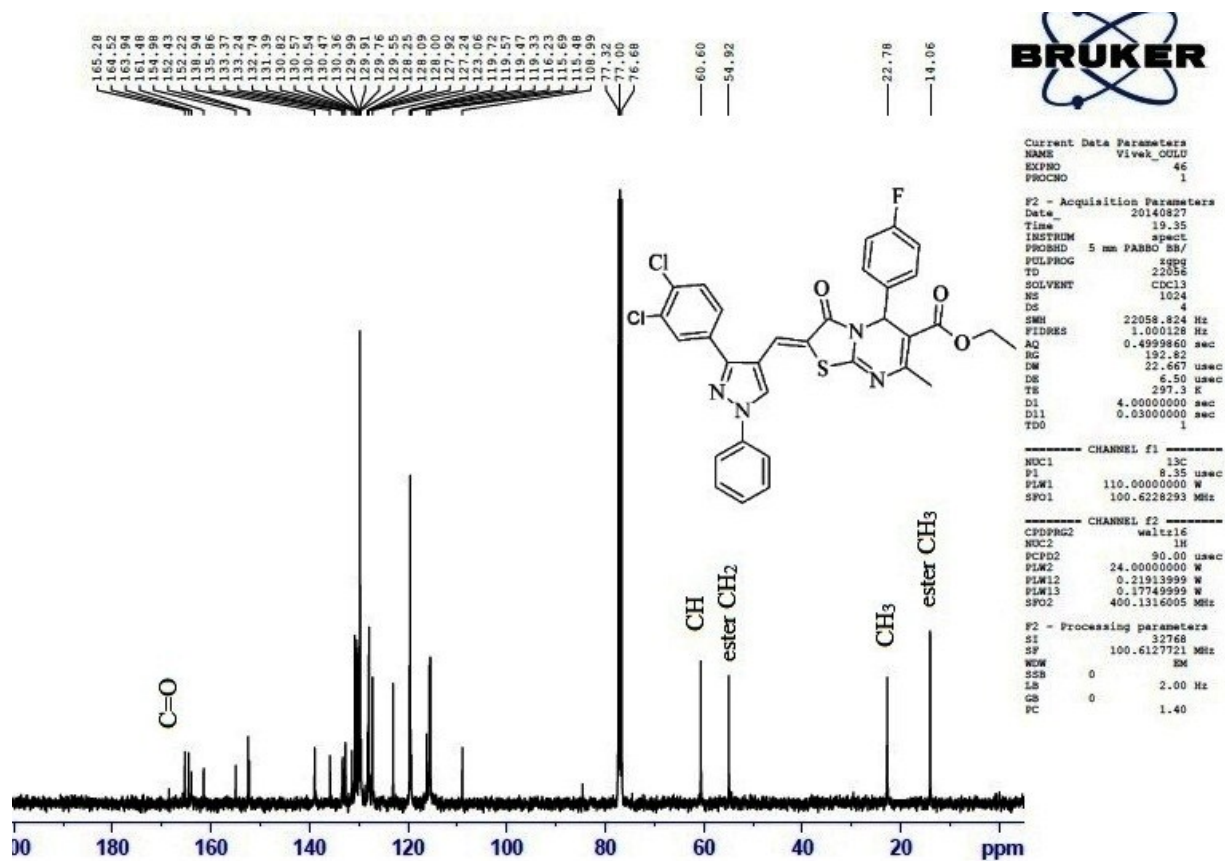

# <sup>13</sup>C NMR of compound of 6a

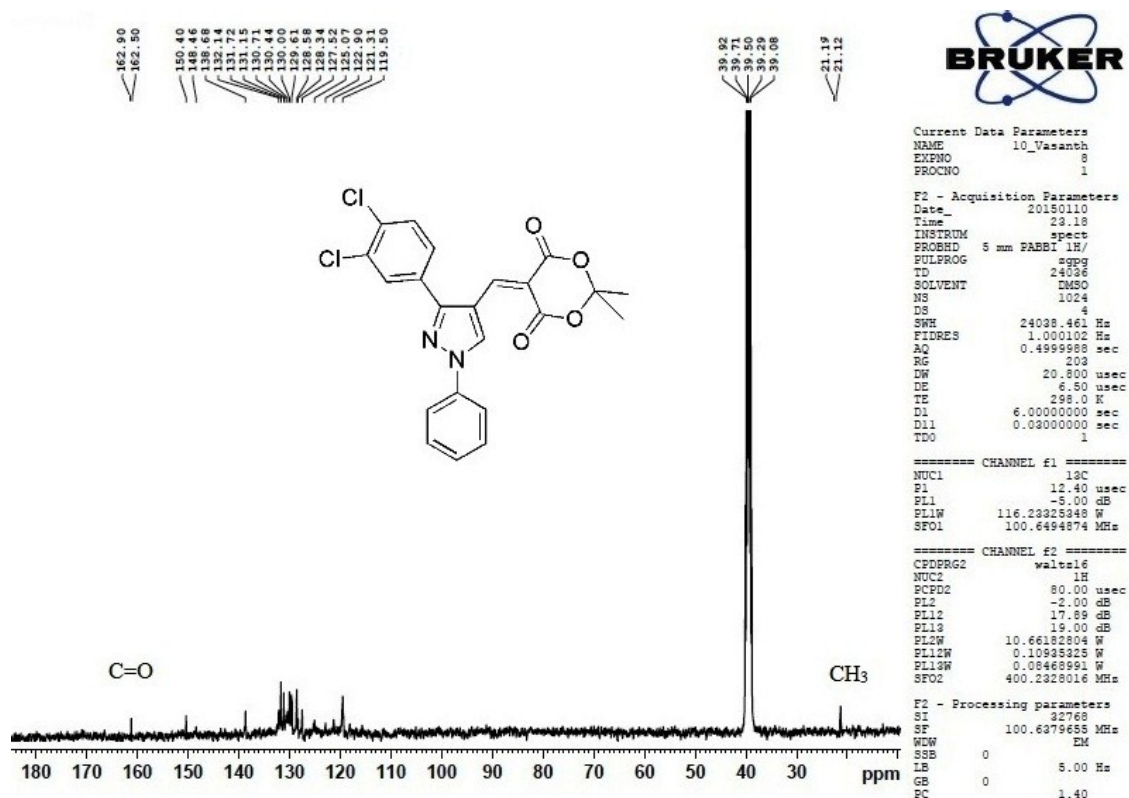

# <sup>13</sup>C NMR of compound of 7a

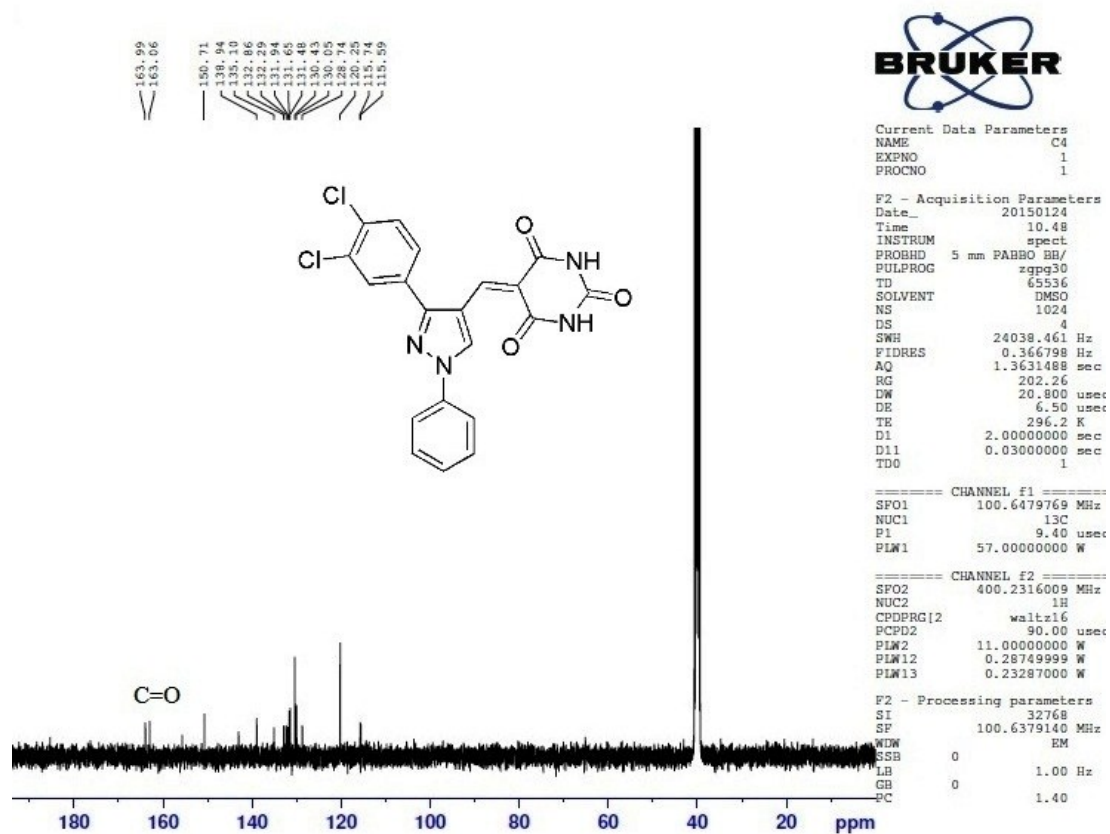



# LCMS spectra of compound **1a**

Method info : A : 0.1%TFA IN H2O B: 0.1%TFA IN ACN Flow = 2.0 mL/min  
COLUMN:XBridge C8 (50X4.6)mm,3.5µm , +ve mode

| Time | % of B |
|------|--------|
| 0    | 5      |
| 8.0  | 100    |
| 8.1  | 100    |
| 8.5  | 5      |
| 10.0 | 5      |

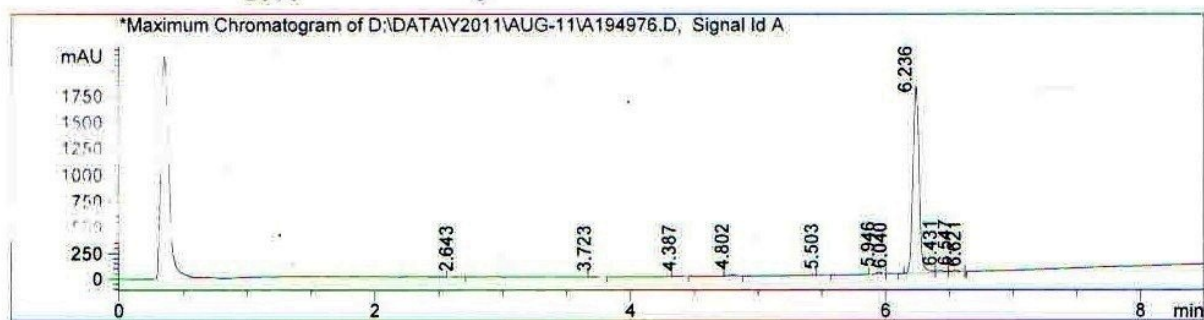

| Peak No | RT min | Area       | Area % |
|---------|--------|------------|--------|
| 1       | 2.643  | 9.585e+000 | 0.153  |
| 2       | 3.723  | 2.066e+001 | 0.329  |
| 3       | 4.387  | 2.394e+001 | 0.382  |
| 4       | 4.802  | 4.906e+001 | 0.782  |
| 5       | 5.503  | 1.950e+001 | 0.311  |
| 6       | 5.946  | 4.539e+001 | 0.723  |
| 7       | 6.040  | 1.146e+001 | 0.183  |
| 8       | 6.236  | 5.969e+003 | 95.124 |
| 9       | 6.431  | 6.862e+001 | 1.094  |
| 10      | 6.547  | 5.590e+001 | 0.891  |
| 11      | 6.621  | 1.829e+000 | 0.029  |

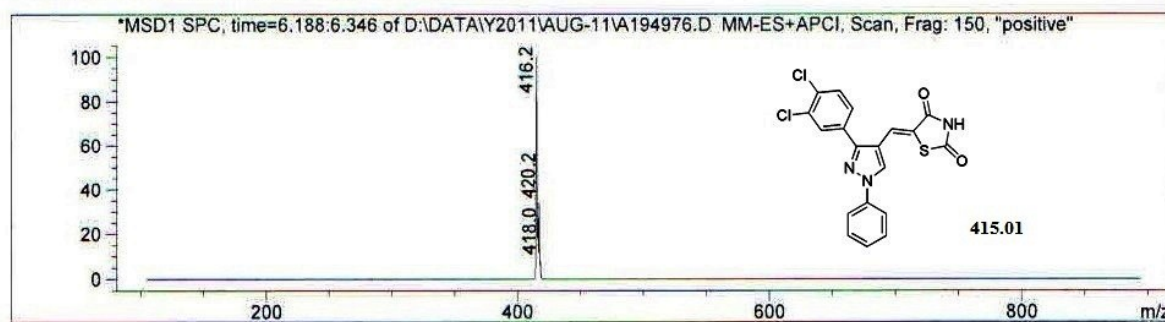

# LCMS spectra of compound 2a

Method info : A : 0.1%TFA IN H2O B: 0.1%TFA IN ACN Flow = 2.0 mL/min  
COLUMN:XBridge C8 (50X4.6)mm,3.5µm , +ve mode

| Time | % of B |
|------|--------|
| 0    | 5      |
| 8.0  | 100    |
| 8.1  | 100    |
| 8.5  | 5      |
| 10.0 | 5      |

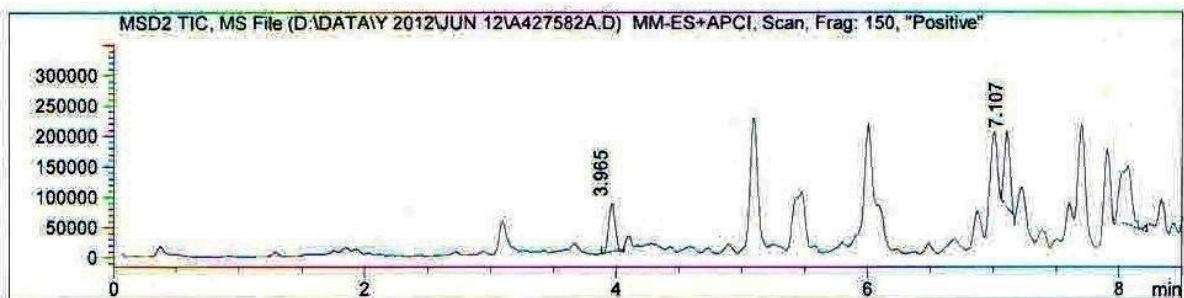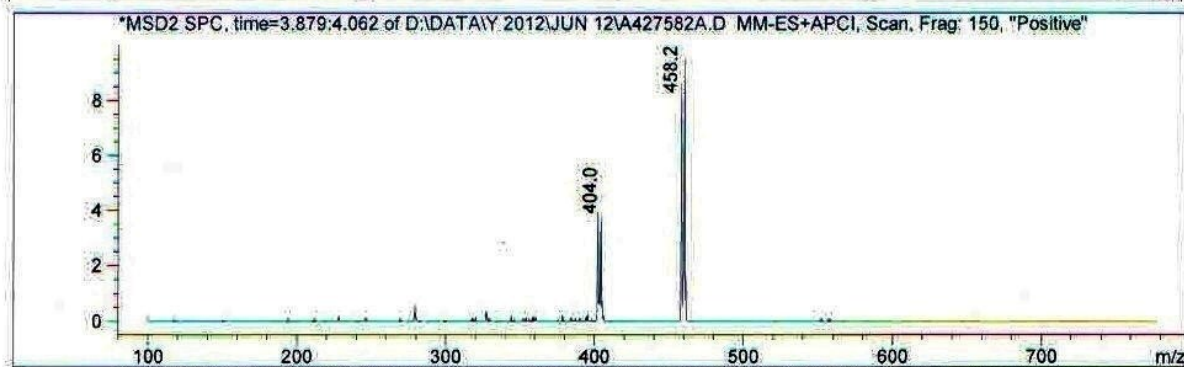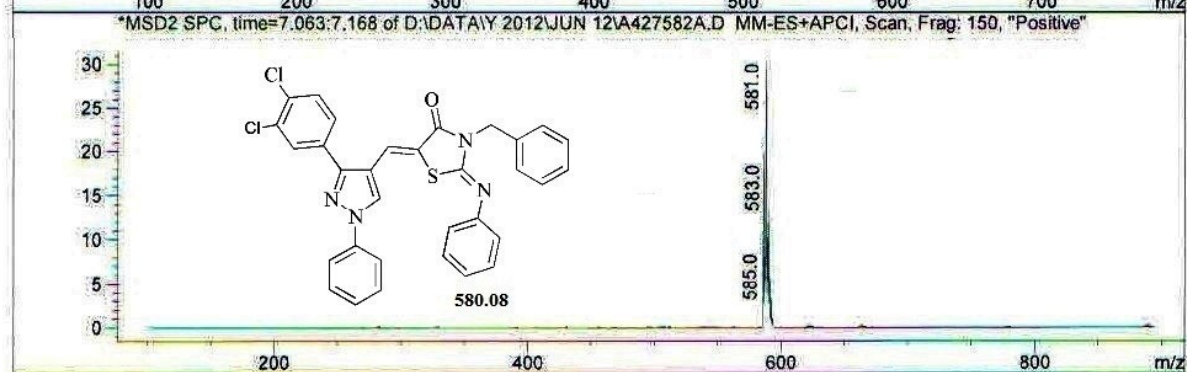

# LCMS spectra of compound 3a

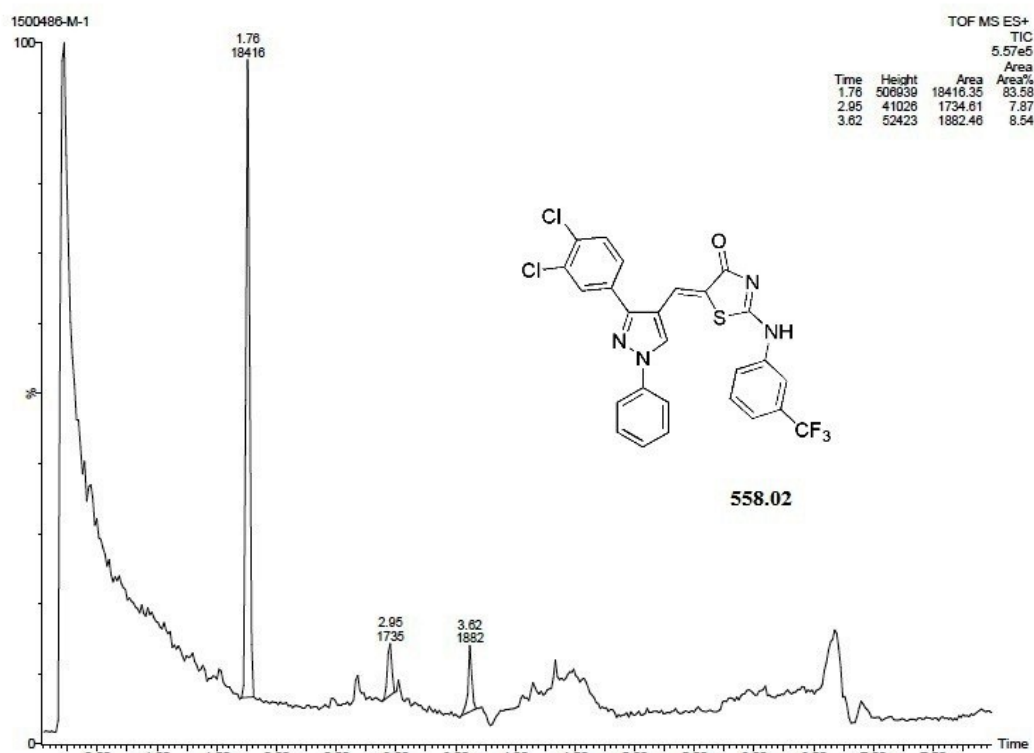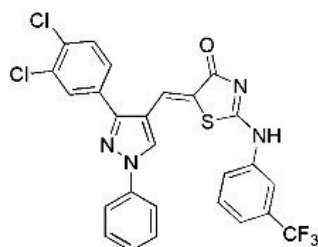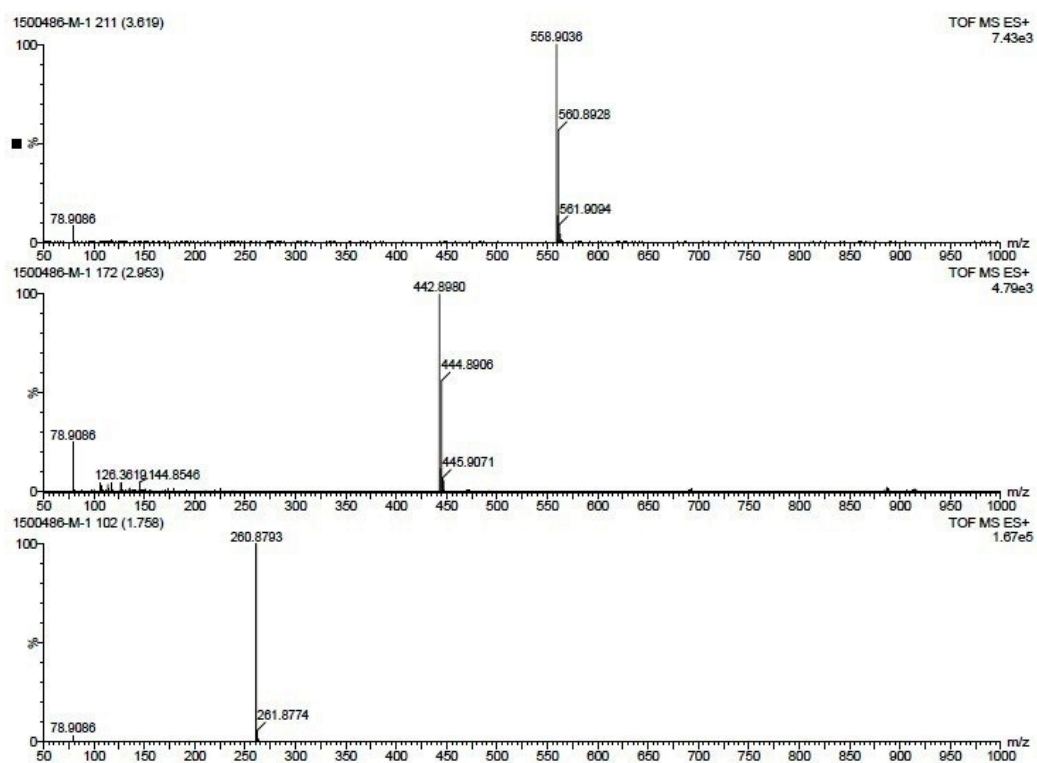

# LCMS spectra of compound 4a

Method info : A: 0.1% TFA IN H<sub>2</sub>O , B:0.1% TFA IN ACN ; Flow Rate:2.0 ml/min  
COLUMN:XBridge C8 (50x4.6mm, 3.5µm), +ve mode

| TIME | %B  |
|------|-----|
| 0    | 05  |
| 8.0  | 100 |
| 8.1  | 100 |
| 8.5  | 05  |
| 10   | 05  |

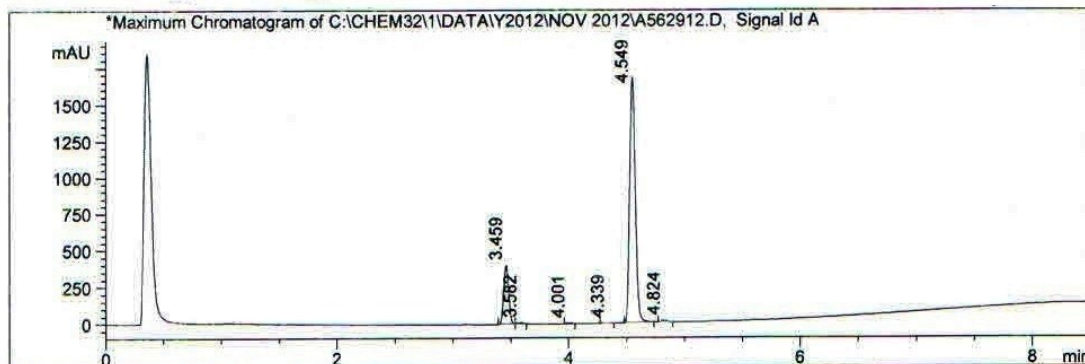

| Peak No | RT min | Area       | Area % |
|---------|--------|------------|--------|
| 1       | 3.459  | 1.198e+003 | 17.207 |
| 2       | 3.582  | 3.089e+001 | 0.444  |
| 3       | 4.001  | 1.827e+001 | 0.262  |
| 4       | 4.339  | 1.084e+001 | 0.156  |
| 5       | 4.549  | 5.671e+003 | 81.475 |
| 6       | 4.824  | 3.175e+001 | 0.456  |

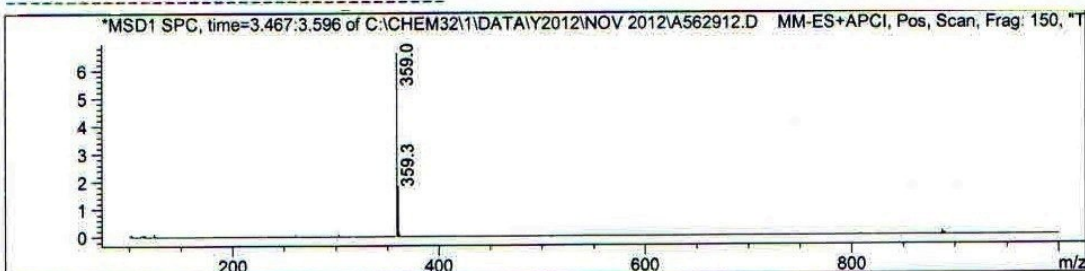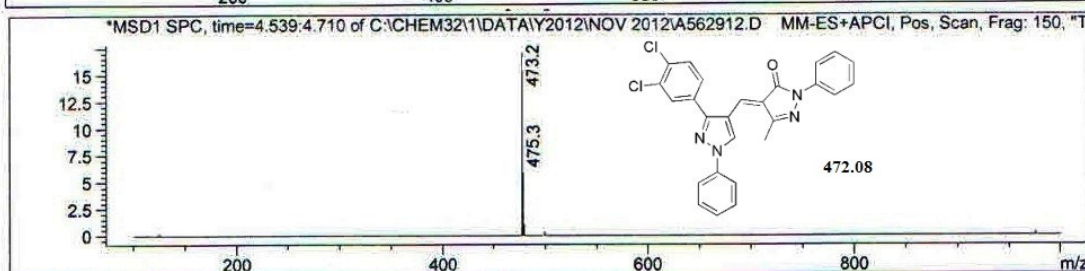



# LCMS spectra of compound 5a

Method info : A-0.1% TFA IN H2O , B-0.1% TFA IN ACN Flow: 2.0 ml/min  
COLUMN: XBridge C8 (50X4.6mm, 3.5µm), +ve mode

| TIME | %B  |
|------|-----|
| 0    | 05  |
| 8.0  | 100 |
| 8.1  | 100 |
| 8.5  | 05  |
| 10   | 05  |

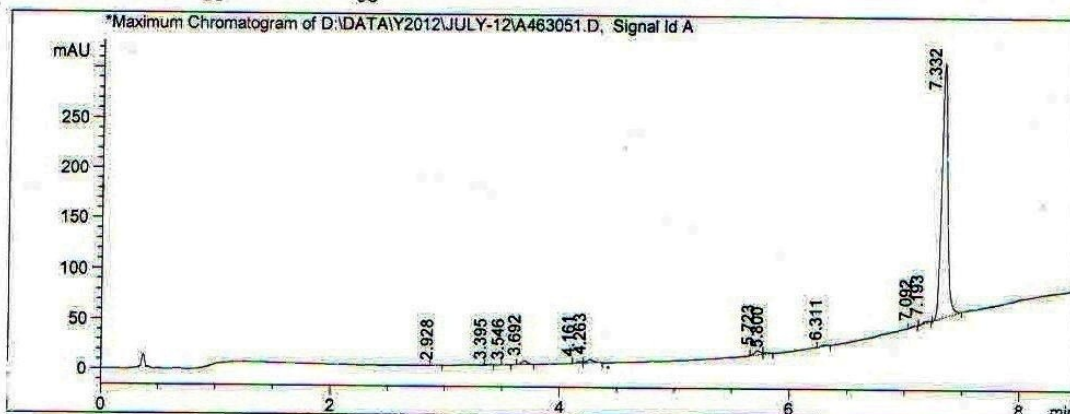

| Peak No. | RT min | Area       | Area % |
|----------|--------|------------|--------|
| 1        | 2.928  | 1.938e+000 | 0.195  |
| 2        | 3.395  | 1.781e-001 | 0.078  |
| 3        | 3.546  | 1.482e+000 | 0.149  |
| 4        | 3.692  | 1.261e+001 | 1.270  |
| 5        | 4.161  | 1.517e+000 | 0.556  |
| 6        | 4.263  | 1.508e+001 | 1.519  |
| 7        | 5.723  | 1.728e+001 | 1.741  |
| 8        | 5.800  | 1.642e+000 | 0.689  |
| 9        | 6.311  | 1.522e+000 | 0.527  |
| 10       | 7.092  | 3.415e+000 | 0.344  |
| 11       | 7.193  | 1.189e+000 | 0.825  |
| 12       | 7.332  | 9.144e+002 | 92.107 |

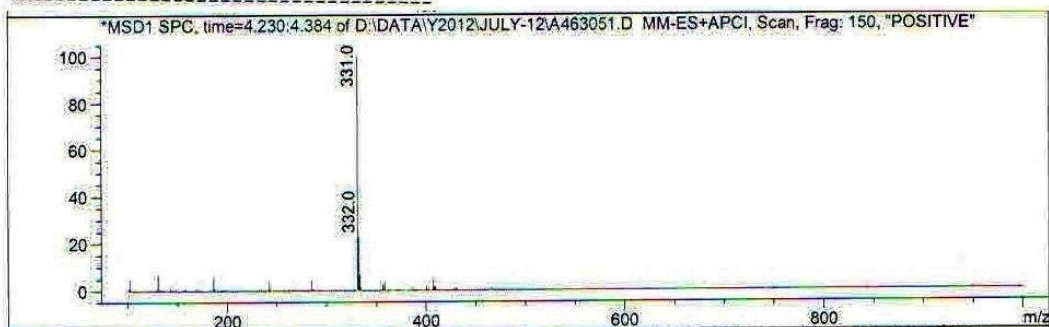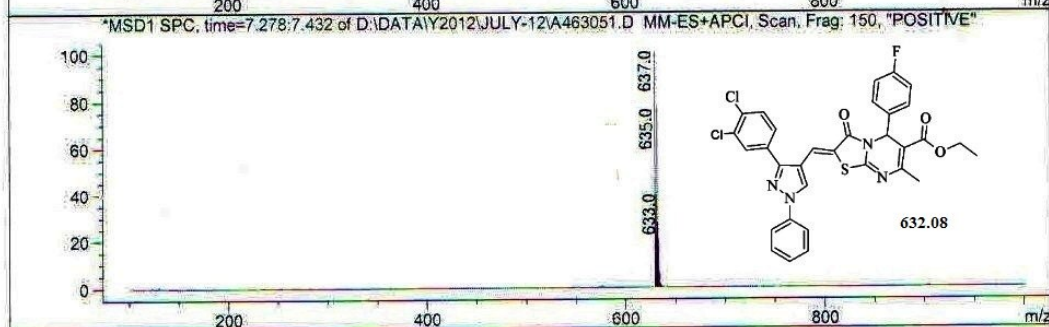



# LCMS spectra of compound 6a

Method info : A: 0.1% TFA IN H<sub>2</sub>O , B:0.1% TFA IN ACN ; Flow Rate:2.0 ml/min  
 COLUMN:XBridge C8 (50x4.6mm, 3.5μ), +ve mode  
 TIME %B  
 0 05  
 8.0 100  
 8.1 100  
 8.5 05  
 10.0 05

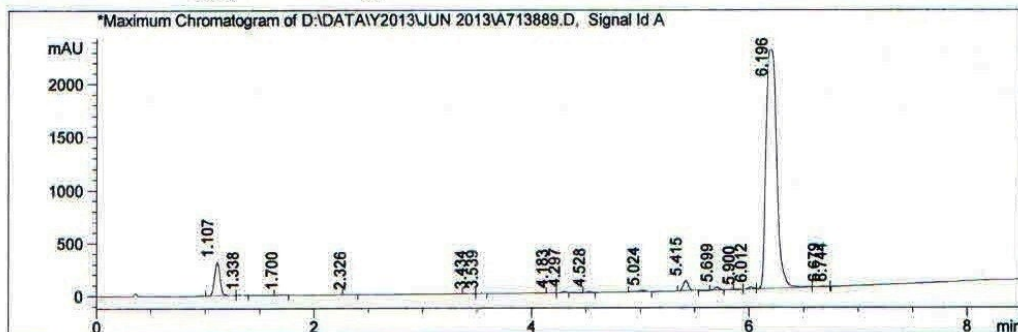

| Peak No | RT min | Area       | Area % |
|---------|--------|------------|--------|
| 1       | 1.107  | 1.111e+003 | 6.296  |
| 2       | 1.338  | 1.934e+001 | 0.110  |
| 3       | 1.700  | 2.205e+001 | 0.125  |
| 4       | 2.326  | 7.594e+000 | 0.043  |
| 5       | 3.434  | 6.061e+000 | 0.034  |
| 6       | 3.539  | 1.099e+001 | 0.062  |
| 7       | 4.183  | 1.292e+001 | 0.073  |
| 8       | 4.297  | 3.330e+001 | 0.189  |
| 9       | 4.528  | 4.966e+001 | 0.281  |
| 10      | 5.024  | 8.780e+001 | 0.498  |
| 11      | 5.415  | 3.351e+002 | 1.899  |
| 12      | 5.699  | 1.102e+002 | 0.625  |
| 13      | 5.900  | 1.930e+001 | 0.109  |
| 14      | 6.012  | 8.632e+001 | 0.489  |
| 15      | 6.196  | 1.568e+004 | 88.866 |
| 16      | 6.679  | 5.087e+001 | 0.288  |
| 17      | 6.744  | 2.154e+000 | 0.012  |

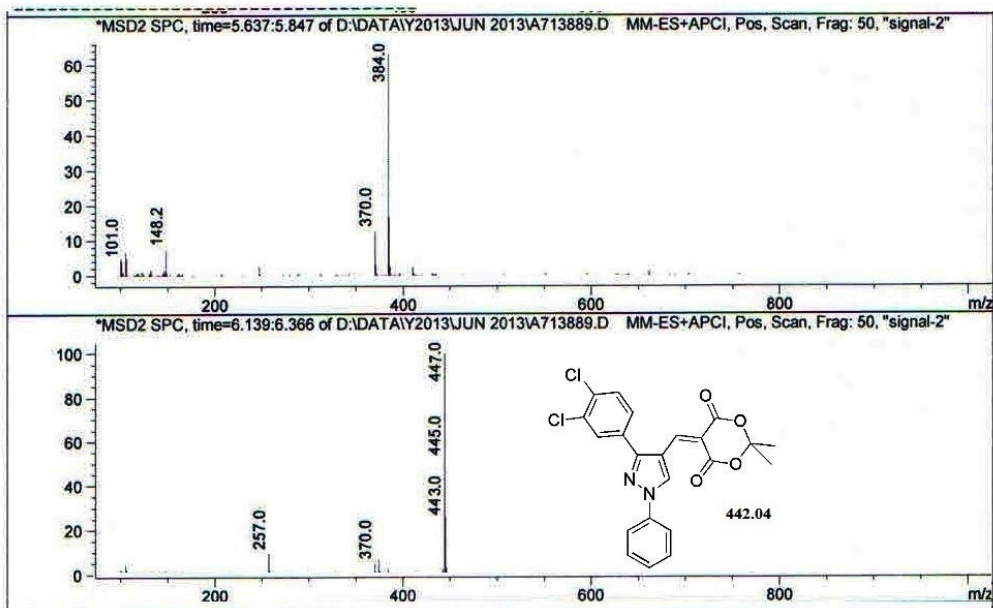

# LCMS spectra of compound **6b**

Method info :

A: 0.1% TFA IN H<sub>2</sub>O , B:0.1% TFA IN ACN ; Flow Rate:2.0 ml/min

COLUMN:XBridge C8 (50x4.6mm, 3.5μ), +ve mode

| TIME | %B  |
|------|-----|
| 0    | 05  |
| 8.0  | 100 |
| 8.1  | 100 |
| 8.5  | 05  |
| 10.0 | 05  |

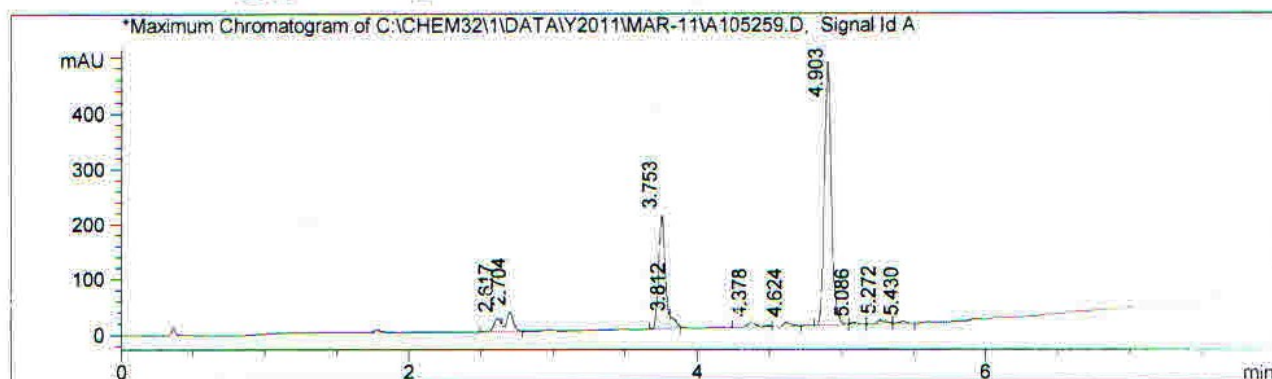

| Peak No | RT min | Area       | Area % |
|---------|--------|------------|--------|
| 1       | 2.617  | 7.257e+001 | 2.772  |
| 2       | 2.704  | 1.178e+002 | 4.498  |
| 3       | 3.753  | 6.381e+002 | 24.374 |
| 4       | 3.812  | 5.511e+001 | 2.105  |
| 5       | 4.378  | 4.717e+001 | 1.802  |
| 6       | 4.624  | 3.432e+001 | 1.311  |
| 7       | 4.903  | 1.587e+003 | 60.604 |
| 8       | 5.086  | 1.225e+001 | 0.468  |
| 9       | 5.272  | 3.363e+001 | 1.285  |
| 10      | 5.430  | 2.047e+001 | 0.782  |

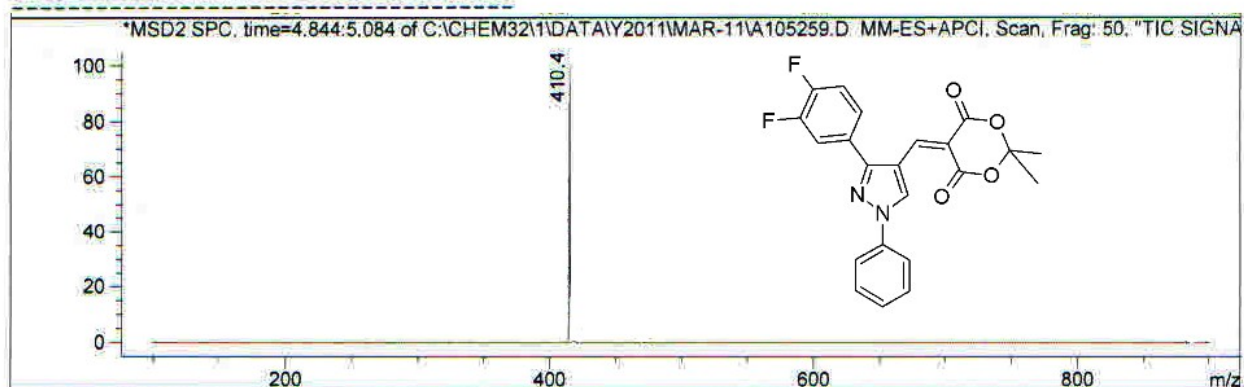

# LCMS spectra of compound 7a

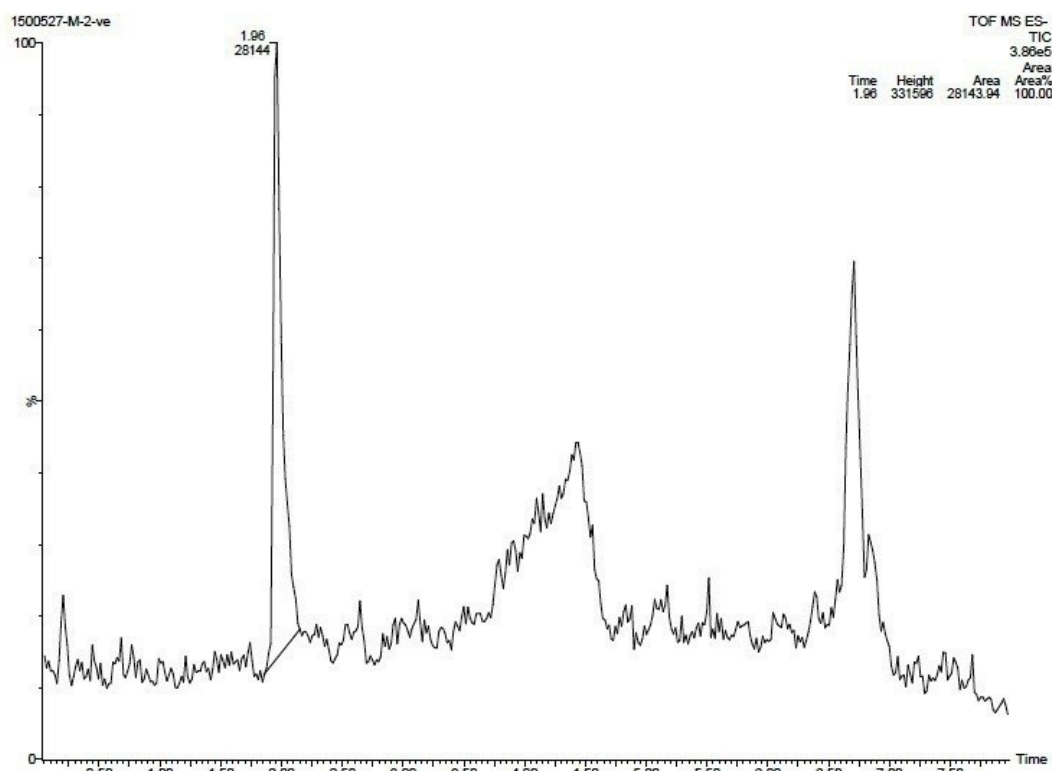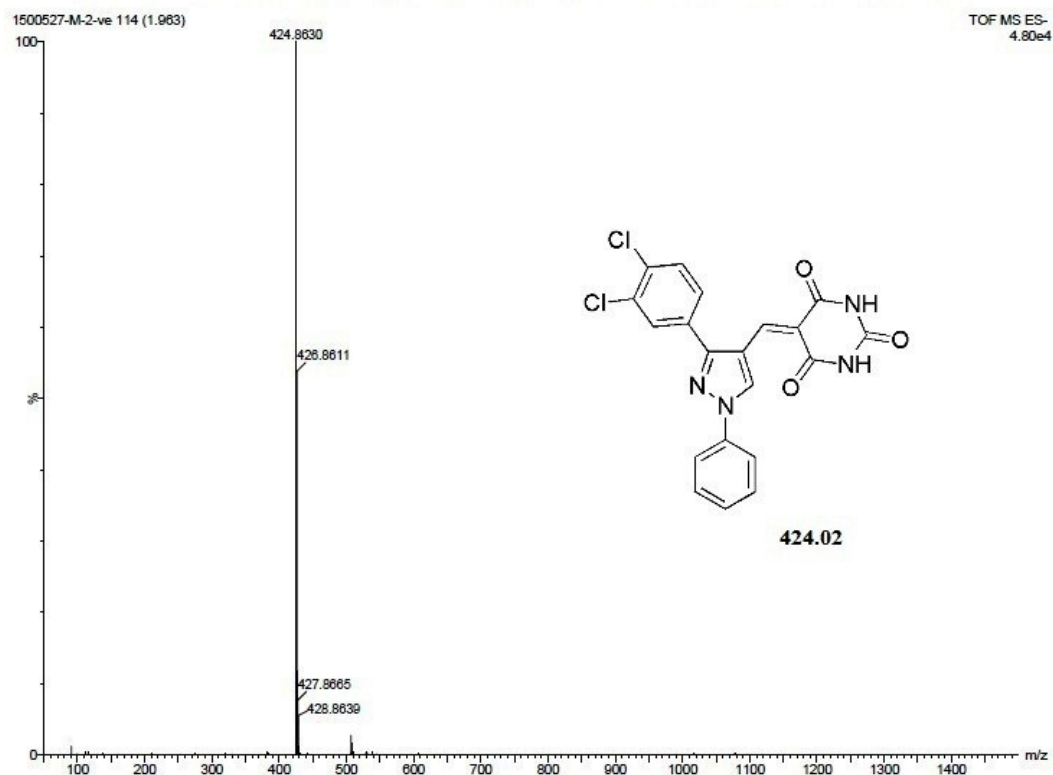

IR spectrum of compound **1a**

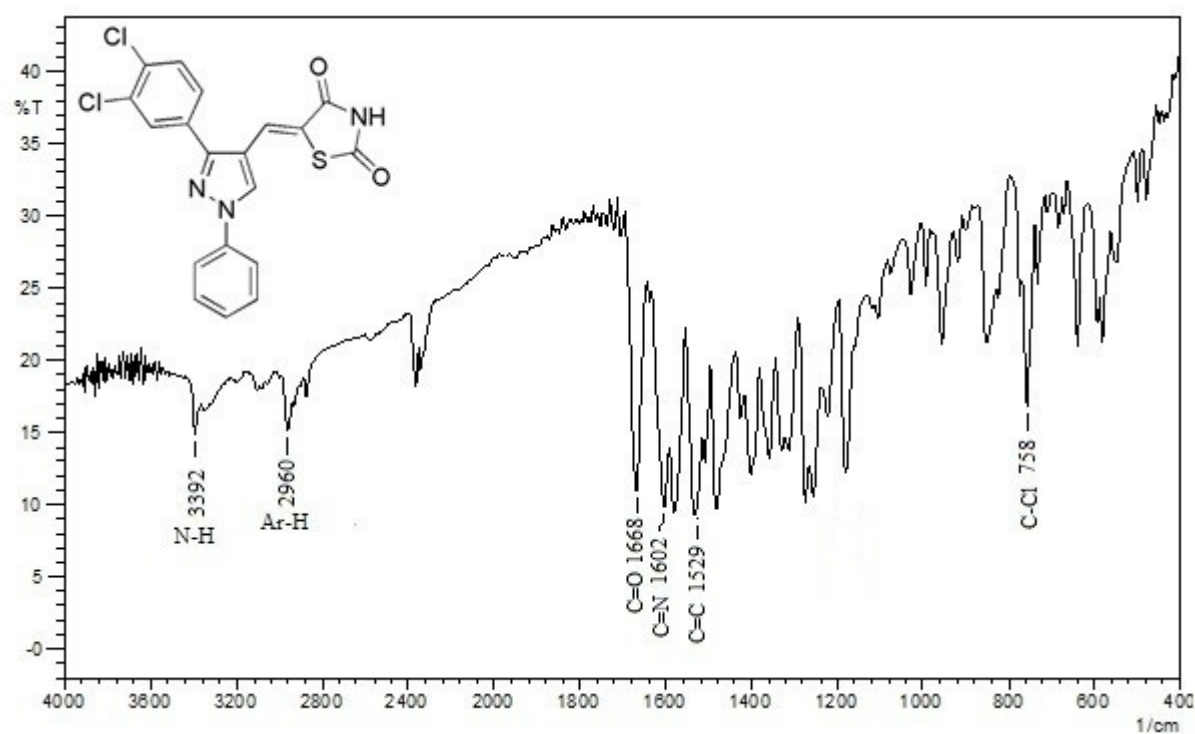

IR spectrum of compound **2a**

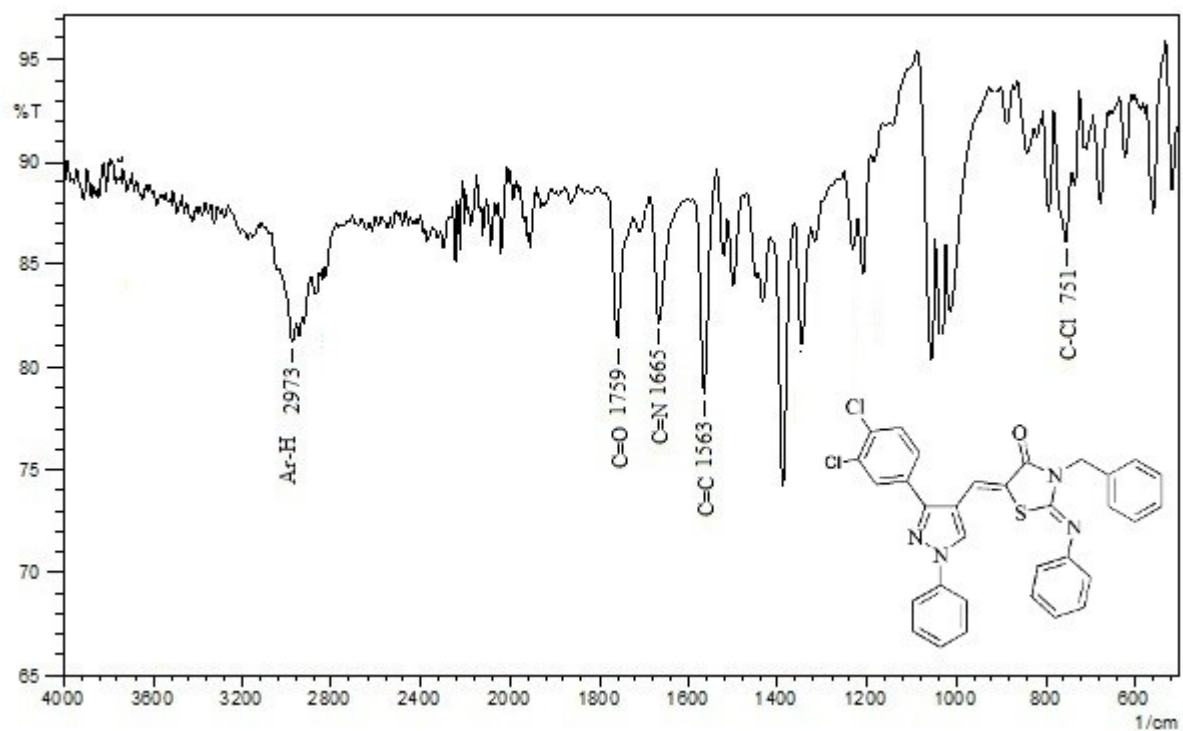

IR spectrum of compound **3a**

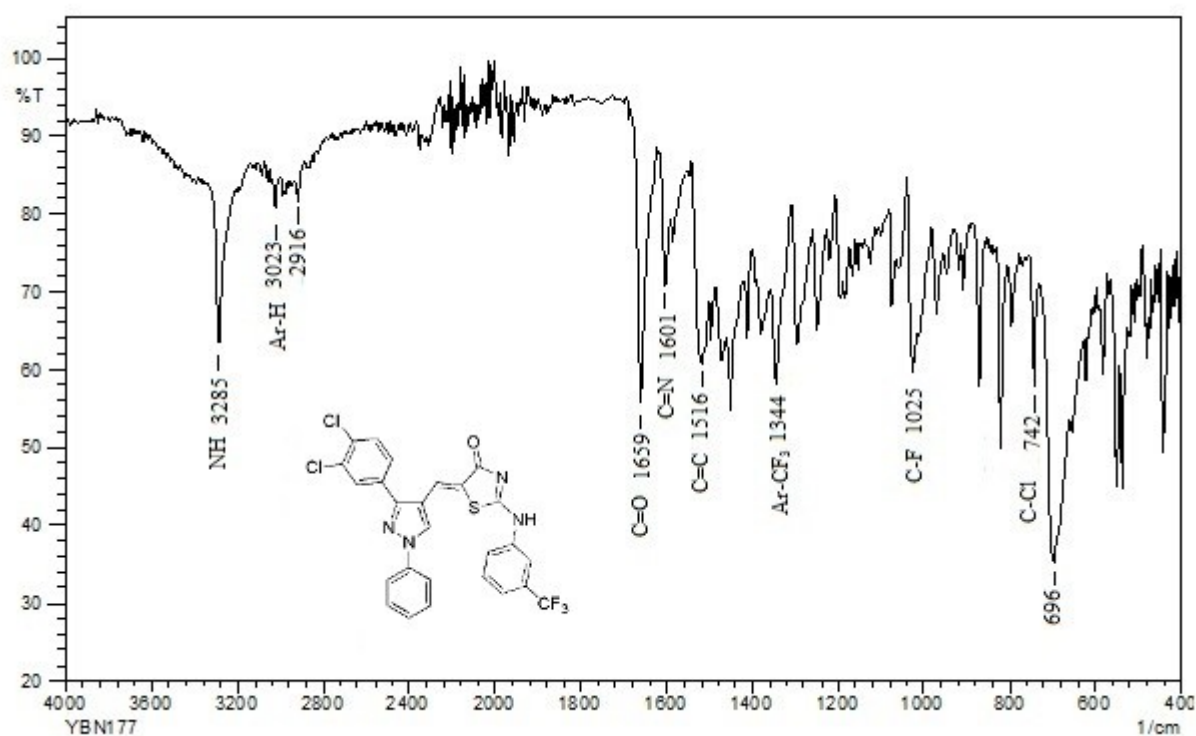

IR spectrum of compound **4a**

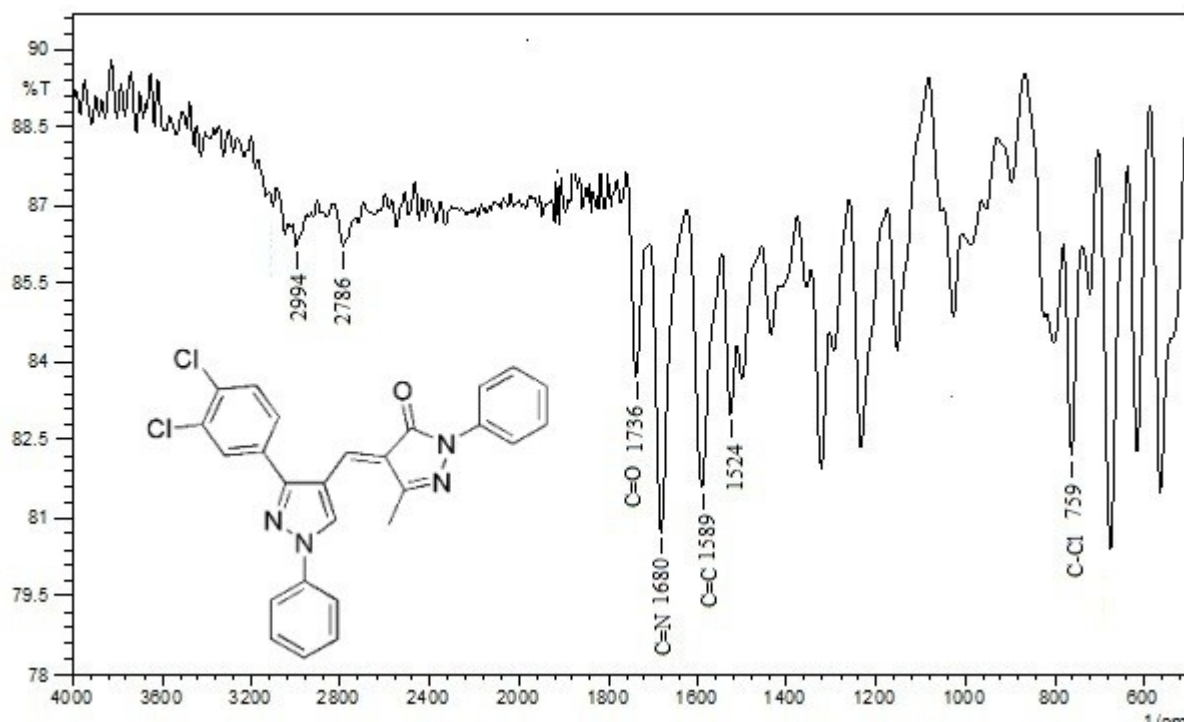



IR spectrum of compound **5a**

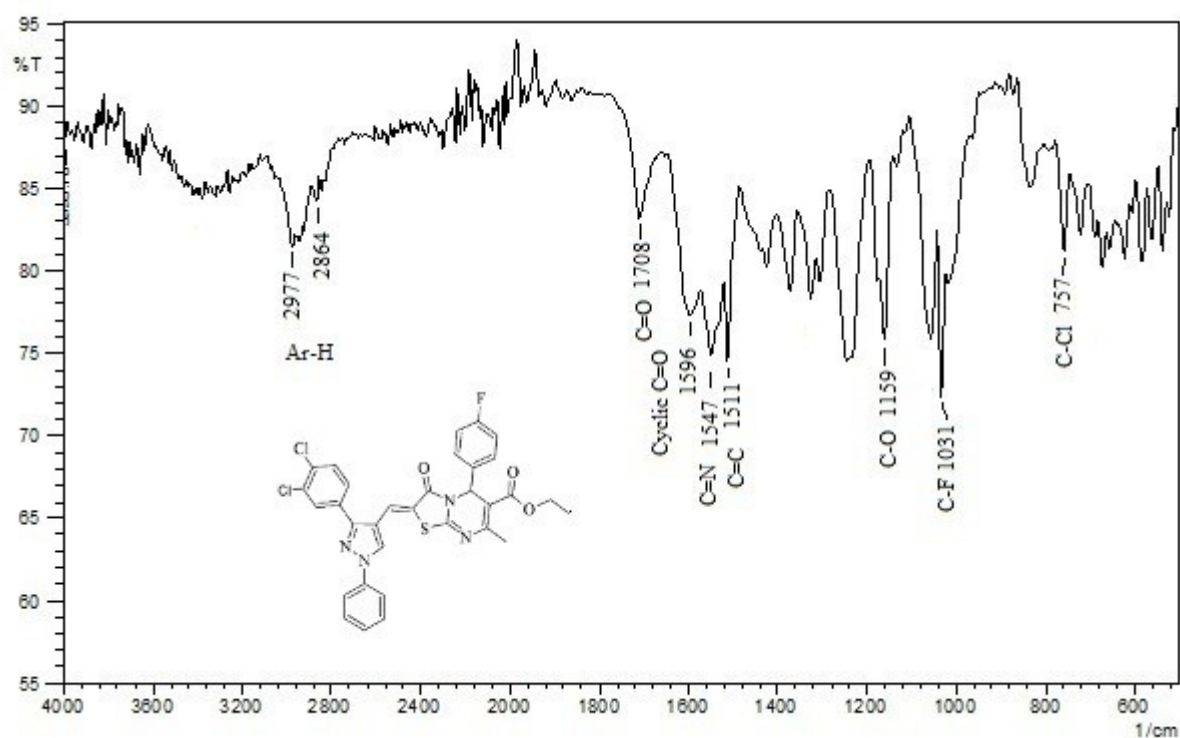

IR spectrum of compound **5b**

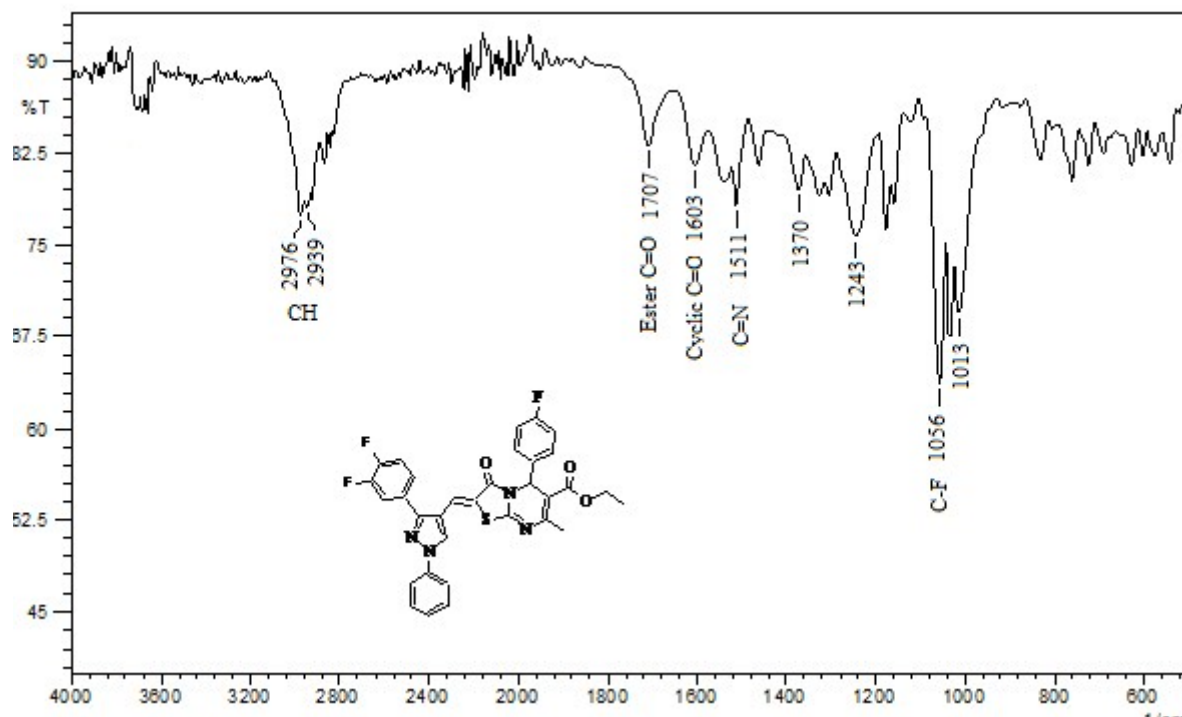

IR spectrum of compound **6a**

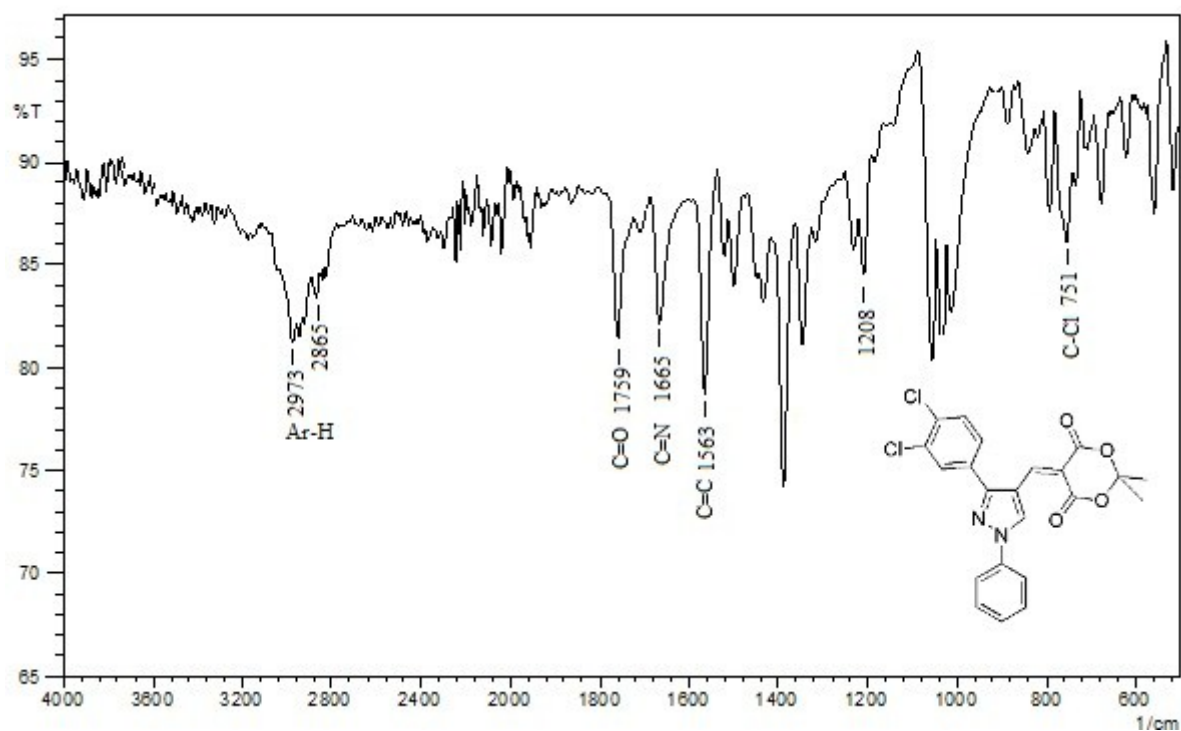

IR spectrum of compound **7a**

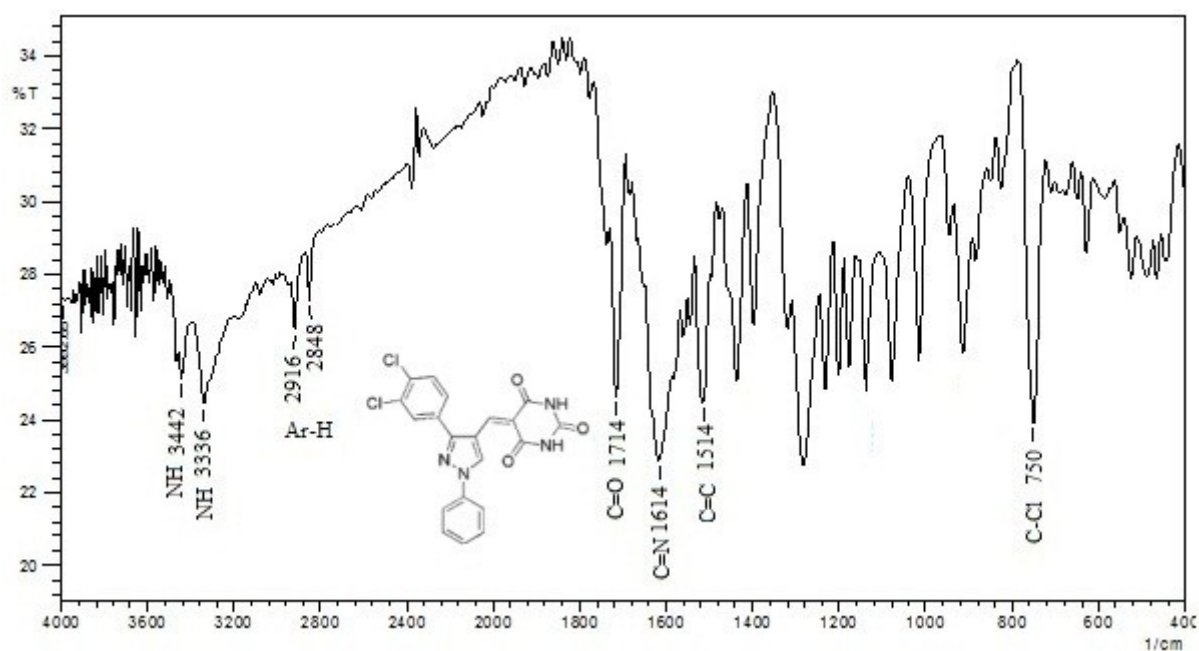

## CHNS analysis of all the synthesised compounds

*Sample Name V-1a to V-7b in the CHNS analyser data  
represents compounds 1a to 7a in the Manuscript.*

Mangalore University  
Department of Chemistry - CHNS Analyser  
Elementar Vario EL III - SI. No. 11054048

17.05.15 13:22

| No.           | Name            | Wght.<br>[mg]     | Date Time                 | Info          | O2                 | C/N<br>Ratio     | Content<br>[%]                                             | Blank<br>Value                     |
|---------------|-----------------|-------------------|---------------------------|---------------|--------------------|------------------|------------------------------------------------------------|------------------------------------|
| <del>21</del> | <del>PZ-1</del> | <del>4.3660</del> | <del>17.05.15 08:09</del> | <del>Su</del> | <del>Index 1</del> | <del>4.293</del> | <del>N: 43.07<br/>C: 56.14<br/>S: 0.000<br/>H: 5.928</del> | <del>0-<br/>0-<br/>0-<br/>0-</del> |
| <del>22</del> | <del>PZ-2</del> | <del>4.1070</del> | <del>17.05.15 08:19</del> | <del>Su</del> | <del>Index 1</del> | <del>4.604</del> | <del>N: 30.09<br/>C: 48.27<br/>S: 0.007<br/>H: 4.138</del> | <del>0-<br/>0-<br/>0-<br/>0-</del> |
| 23            | V-1a            | 4.2500            | 17.05.15 08:39            | viv           | Index 1            | 5.448            | N: 10.07<br>C: 54.86<br>S: 7.675<br>H: 2.602               | 0<br>0<br>0<br>0                   |
| 24            | V-1b            | 3.5190            | 17.05.15 08:51            | viv           | Index 1            | 5.420            | N: 10.98<br>C: 59.51<br>S: 8.388<br>H: 2.889               | 0<br>0<br>0<br>0                   |
| 25            | V-2a            | 3.1990            | 17.05.15 09:02            | viv           | Index 1            | 6.832            | N: 9.671<br>C: 66.07<br>S: 5.484<br>H: 3.848               | 0<br>0<br>0<br>0                   |
| 26            | V-2b            | 3.5030            | 17.05.15 09:12            | viv           | Index 1            | 6.888            | N: 10.17<br>C: 70.05<br>S: 5.851<br>H: 4.068               | 0<br>0<br>0<br>0                   |
| 27            | V-3a            | 3.5930            | 17.05.15 09:24            | viv           | Index 1            | 5.580            | N: 10.00<br>C: 55.80<br>S: 5.707<br>H: 2.728               | 0<br>0<br>0<br>0                   |
| 28            | V-3b            | 3.5740            | 17.05.15 09:35            | viv           | Index 1            | 5.558            | N: 10.67<br>C: 59.30<br>S: 6.078<br>H: 2.884               | 0<br>0<br>0<br>0                   |
| 29            | V-3c            | 3.8890            | 17.05.15 09:46            | viv           | Index 1            | 5.330            | N: 11.47<br>C: 61.14<br>S: 6.582<br>H: 3.277               | 0<br>0<br>0<br>0                   |

| No. | Name | Wght.<br>[mg] | Date Time      | Info | O2      | C/N<br>Ratio | Content<br>[%]                               | Blank<br>Value   |
|-----|------|---------------|----------------|------|---------|--------------|----------------------------------------------|------------------|
| 30  | V-3d | 3.0970        | 17.05.15 09:56 | viv  | Index 1 | 5.382        | N: 12.17<br>C: 65.50<br>S: 6.970<br>H: 3.480 | 0<br>0<br>0<br>0 |
| 31  | V-4a | 3.5600        | 17.05.15 10:08 | viv  | Index 1 | 5.560        | N: 11.86<br>C: 65.94<br>S: 0.001<br>H: 3.819 | 0<br>0<br>0<br>0 |
| 32  | V-4b | 4.4850        | 17.05.15 10:20 | viv  | Index 1 | 5.589        | N: 12.69<br>C: 70.93<br>S: 0.000<br>H: 4.103 | 0<br>0<br>0<br>0 |
| 33  | V-5a | 3.9040        | 17.05.15 10:38 | viv  | Index 1 | 6.818        | N: 8.902<br>C: 60.69<br>S: 5.033<br>H: 3.679 | 0<br>0<br>0<br>0 |
| 34  | V-5b | 4.2420        | 17.05.15 10:49 | viv  | Index 1 | 6.858        | N: 9.327<br>C: 63.96<br>S: 5.327<br>H: 3.842 | 0<br>0<br>0<br>0 |
| 35  | V-6a | 3.9570        | 17.05.15 11:01 | viv  | Index 1 | 9.450        | N: 6.312<br>C: 59.65<br>S: 0.004<br>H: 3.670 | 0<br>0<br>0<br>0 |
| 36  | V-6b | 4.7990        | 17.05.15 11:21 | viv  | Index 1 | 9.396        | N: 6.849<br>C: 64.35<br>S: 0.002<br>H: 3.943 | 0<br>0<br>0<br>0 |
| 37  | V-7a | 3.7970        | 17.05.15 11:32 | viv  | Index 1 | 4.288        | N: 13.11<br>C: 56.22<br>S: 0.002<br>H: 2.832 | 0<br>0<br>0<br>0 |
| 38  | V-7b | 3.1700        | 17.05.15 11:45 | viv  | Index 1 | 4.274        | N: 14.25<br>C: 60.91<br>S: 0.001<br>H: 3.070 | 0<br>0<br>0<br>0 |
